# Supplementary material for: The MT-CO1 V83I Polymorphism is a Risk Factor for Primary Open-Angle Glaucoma in African American Men
Source: PubMed Central journal article supplement — Invest Ophthalmol Vis Sci. 2018 Apr;59(5):1751–9. doi: 10.1167/iovs.17-23277 (PMC5886029; doi:10.1167/iovs.17-23277), 2018-04
Supplement: iovs-59-03-21_s01.pdf [file iovs-59-03-21_s01.pdf]

## SUPPLEMENTARY ONLINE MATERIAL

**Supplementary Table S1.** Missense variants in CO1 identified by Sanger sequencing, AA POAG cases and controls (n=2,152 for position m.6150)\*.

| Variant (rCRS) | AA Change | SIFT prediction | SIFT score | Variant cases (obs.) | WT cases (obs.) | Variant controls (obs.) | WT controls (obs.) | p-value |
|----------------|-----------|-----------------|------------|----------------------|-----------------|-------------------------|--------------------|---------|
| m.5911C>T      | A3V       | neutral         | 0.11       | 11                   | 895             | 2                       | 379                | 0.37    |
| m.5913G>A      | D4N       | neutral         | 0.47       | 5                    | 903             | 0                       | 386                | 0.33    |
| m.5935A>G      | N11S      | neutral         | 0.05       | 0                    | 968             | 1                       | 477                | 0.33    |
| m.5961C>A      | L20M      | deleterious     | 0.00       | 1                    | 1023            | 0                       | 550                | 1.00    |
| m.5970G>A      | G23S      | neutral         | 0.08       | 2                    | 1040            | 0                       | 569                | 0.54    |
| m.6039A>G      | N46D      | deleterious     | 0.04       | 0                    | 1091            | 1                       | 644                | 0.37    |
| m.6040 A>C     | N46T      | deleterious     | 0.03       | 1                    | 1090            | 1                       | 644                | 1.00    |
| m.6040A>G      | N46S      | neutral         | 0.42       | 2                    | 1089            | 0                       | 645                | 0.53    |
| m.6052A>G      | N50S      | neutral         | 1.00       | 0                    | 1168            | 1                       | 742                | 0.39    |
| m.6150G>A      | V83I      | neutral         | 0.20       | 72                   | 1235            | 26                      | 819                | 0.008   |
| m.6249G>A      | A116T     | neutral         | 0.45       | 3                    | 1305            | 2                       | 844                | 1.00    |
| m.6253T>C      | M117T     | neutral         | 0.09       | 60                   | 1248            | 24                      | 822                | 0.04    |
| m.6267G>A      | A122T     | neutral         | 0.37       | 9                    | 1299            | 7                       | 839                | 0.80    |
| m.6286T>C      | V128A     | neutral         | 0.22       | 3                    | 1305            | 2                       | 844                | 1.00    |
| m.6339A>G      | T146A     | deleterious     | 0.00       | 1                    | 1307            | 0                       | 845                | 1.00    |
| m.6340C>T      | T146I     | neutral         | 1.00       | 1                    | 1307            | 1                       | 844                | 1.00    |
| m.6345T>C      | F148L     | deleterious     | 0.00       | 2                    | 1306            | 1                       | 844                | 1.00    |
| m.6366G>A      | V155I     | neutral         | 0.11       | 4                    | 1304            | 2                       | 842                | 1.00    |
| m.6367T>C      | V155A     | neutral         | 1.00       | 1                    | 1307            | 0                       | 844                | 1.00    |
| m.6480G>A      | V193I     | neutral         | 0.23       | 14                   | 1292            | 2                       | 845                | 0.04    |
| m.6481T>C      | V193A     | neutral         | 0.72       | 1                    | 1304            | 1                       | 846                | 1.00    |
| m.6546C>T      | L215F     | deleterious     | 0.00       | 0                    | 1300            | 1                       | 846                | 0.39    |
| m.6663A>G      | I254V     | neutral         | 0.69       | 40                   | 1245            | 24                      | 812                | 0.80    |
| m.6678A>G**    | T259A     | neutral         | 0.25       | 1                    | 1022            | 0                       | 525                | 1.00    |

\*. Lower sequencing coverage was obtained for positions other than m.6150. Table 1 in main text includes data on m.6150 from 37 subjects who subsequently enrolled in the study.

\*\* = novel variant

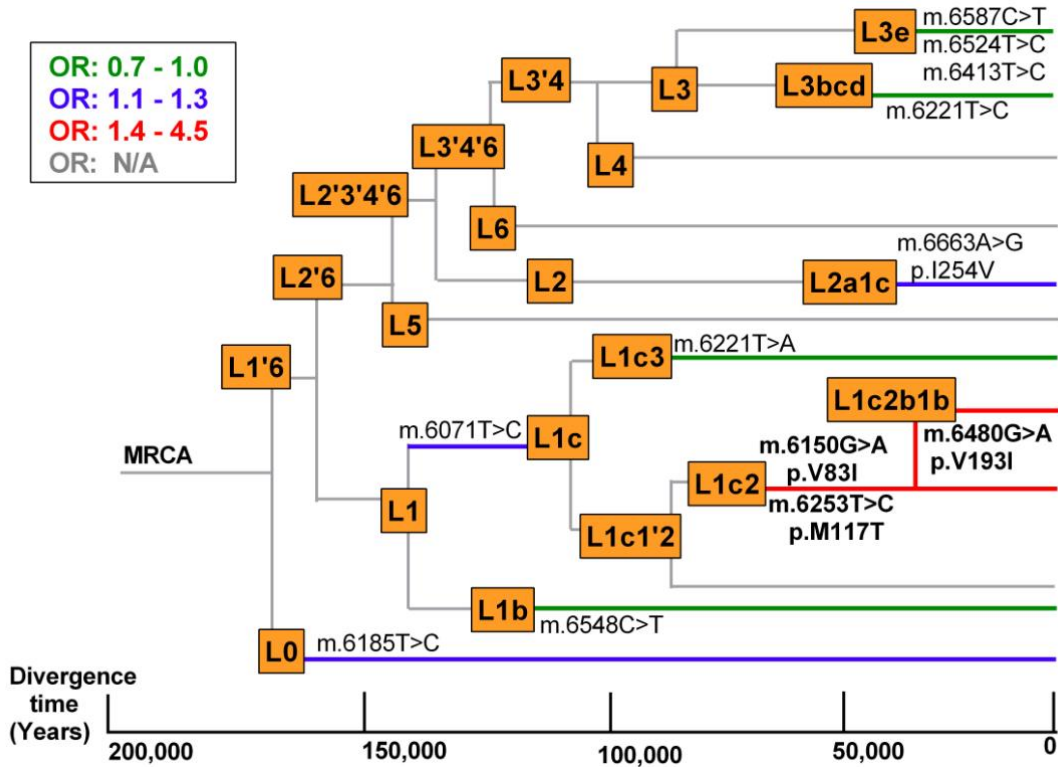

**Supplementary Figure S1.** Evolutionary relationship and POAG associations of common AA *MT-CO1* variants, from Sanger sequencing. Colored shading indicates the relative frequencies of the variants in cases : controls (odds ratio [OR]). Amino acid changes are indicated for missense variants, and the three missense variants with POAG association are highlighted with bold font. The m.6150G>A (V83I) variant was also observed on non-L1 lineages in POAAGG subjects (not shown).

MRCA=most recent common ancestor

# Co1 protein

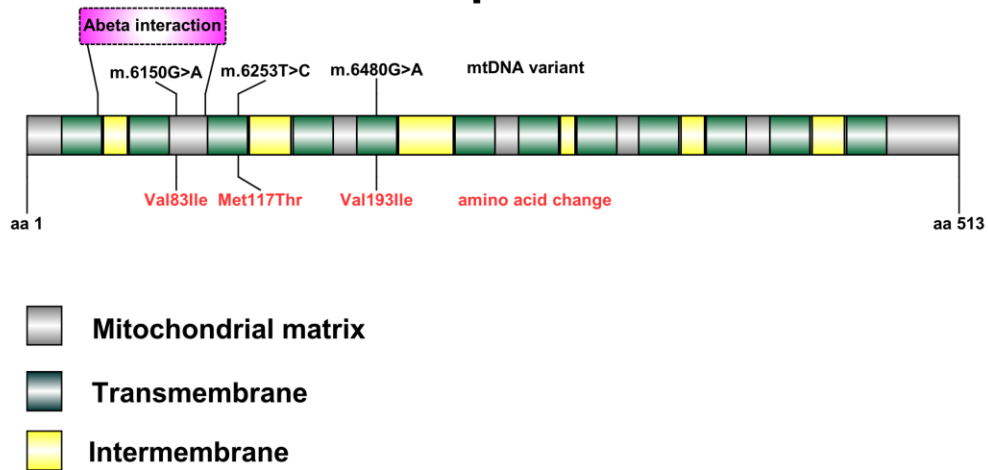

**Supplementary Figure S2.** Predicted domain structure of the CO1 protein and subcellular localizations of three POAG-associated missense variants.

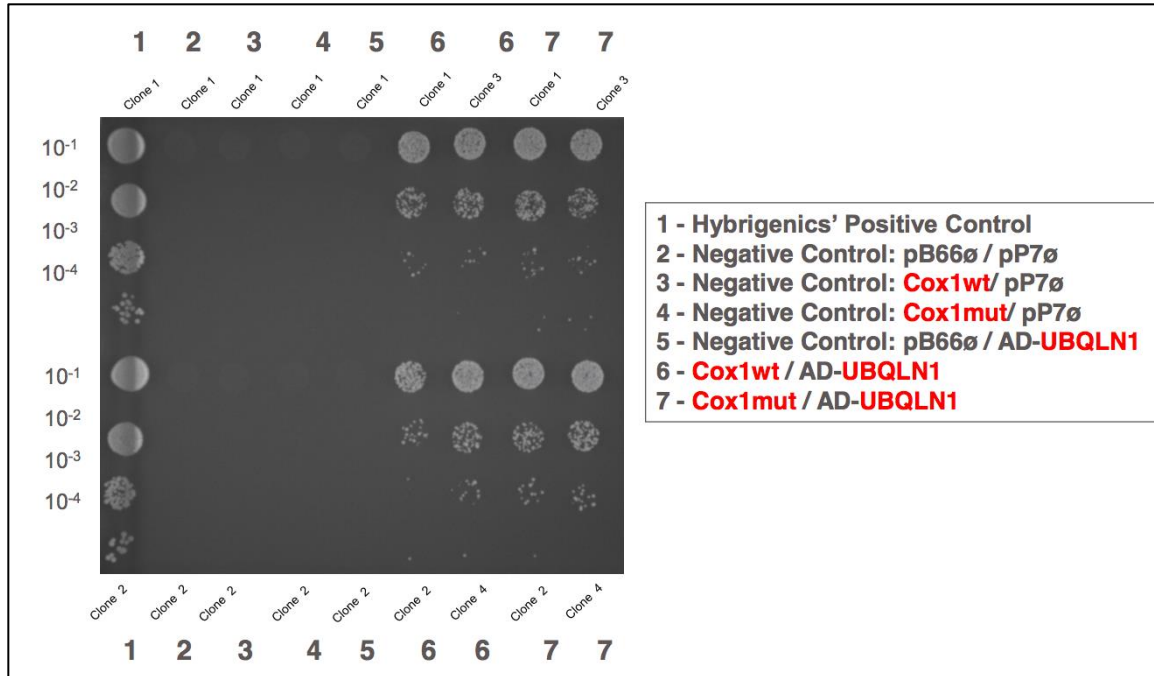

**Supplementary Figure S3.** Quantification of interaction of wild type CO1 (“Cox1wt”) or V83I CO1 (“Cox1mut”) with UBQLN1 in the yeast two-hybrid system. The growth medium contained 10mM 3-AT, and cells were plated at four dilutions, as indicated at left.
